# Supplementary material for: The evolution of the dystroglycan complex, a major mediator of muscle integrity
Source: PubMed Central journal article supplement (PMC4582122; doi:10.1242/bio.012468), 2015-08-28
Supplement: supp_bio.012468_BIO012468supp.pdf [file supp_bio.012468_BIO012468supp.pdf]

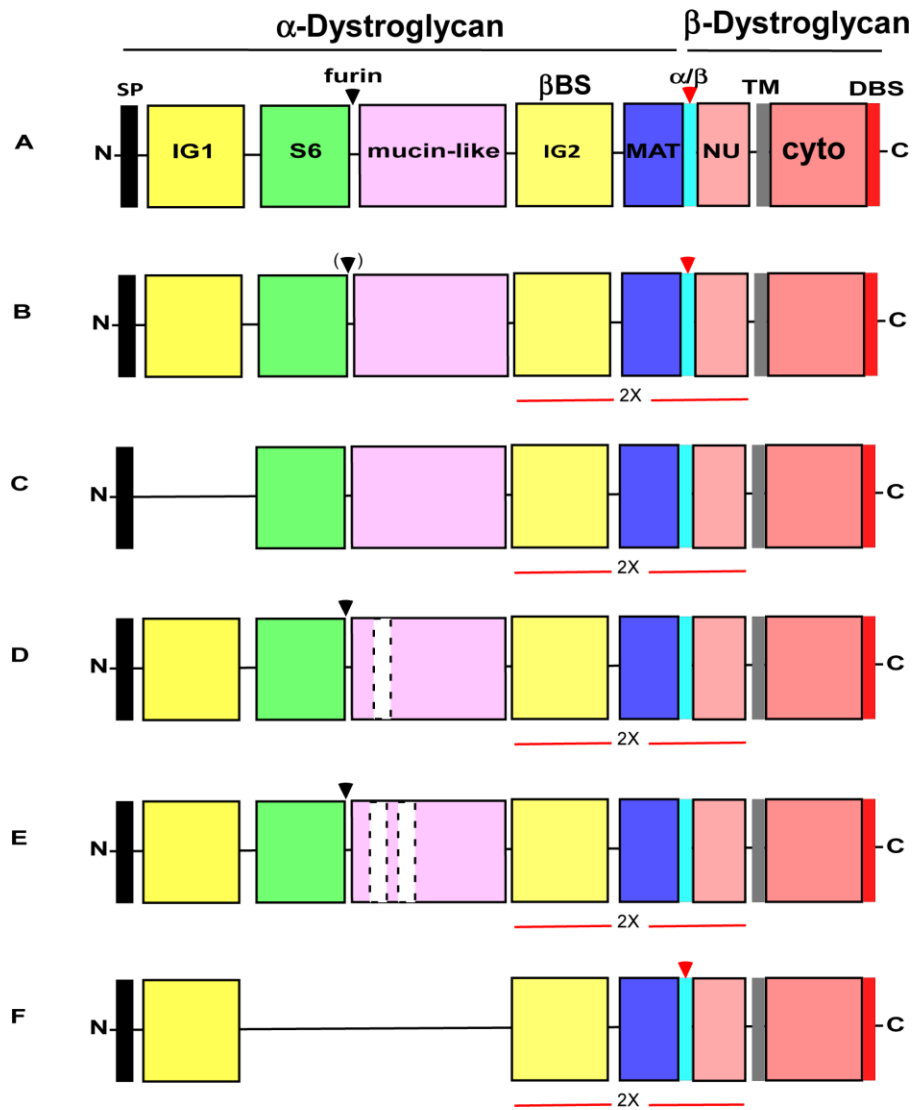

**Fig. S1:** Domain architectures of dystroglycans from different classes of arthropods. (A), The typical DG of vertebrates. (B), the domain architecture of most DGs of arthropods (as shown in Fig. 1). B, The DGs of hymenopteran (*Camponotus floridanus*, *Acromyrmex echinator*, *Cerapachys biroi*), dictyopteran insects (*Zootermopsis nevadensis*) and chelicerates (*Amblyomma triste*) have a similar organization to that of vertebrate DGs, and an  $\alpha/\beta$  maturation site. Variant domain organisations are shown in C-F. (C), The DGs of dipteran insects (*Drosophila melanogaster* and *Bactrocera dorsalis*) lack an IG1 domain. (D), The DG of a lepidopteran insect, *Bombyx mori*, has a unique insertion in the mucin-like region. (E), the DG of a coleopteran insect (*Dendroctonus ponderosae*) has two insertions in the mucin-like region. (F), The DG of the crustacean *Daphnia pulex* lacks a mucin-like module but contains a Gly-Ser maturation site. Black arrowheads indicate the furin cleavage site (brackets indicate that this motif is variably present in the DGs represented in (B)). Red arrowheads indicate the conserved  $\alpha/\beta$  maturation site. Key: SP, signal peptide; IG1 and IG2, immunoglobulin-like domains; S6, S6-like domain;  $\beta$ BS,  $\beta$ -DG binding site; MAT, C-terminal region of  $\alpha$ -dystroglycan upstream of the maturation site; NU, natively unfolded region; TM, transmembrane; Cyto, cytoplasmic domain; DBS, dystrophin-binding site. A white box with dotted lines indicates the presence of an inserted sequence.



**Fig. S2: *Nematostella vectensis* DG includes tandem repetitions of the IG2\_MAT\_NU module.** A large insertion, downstream of the mucin-like region, includes five tandem IG2\_MAT\_NU modules, making a total of six modules. A CLUSTALW alignment of this region with the IG2\_MAT\_NU module of human DG (represented 6 times) is shown. In each representation of the human IG2\_MAT\_NU region, the amino acid residues are shown in yellow for the IG2 domain, blue for the MAT region and red for the NU domain. The symbol ‘\*’ indicates an identical residue; ‘.’ a conservative substitution and ‘.’ a semi-conservative substitution.

Hs -----MRMSVGLSLLLP---LSGRTFLLLLSVVMAQSHWPSEPSEAVRDWENQL  
 Lc -----SSDLPPFFIASSTMTATLPTSTIASSSMQASQPVPASSALFT-DTSL  
 Oc SSTSLLTATLSSKFSSNFVSPSPTVNETSSLVISTSAVGTSSLSLSPTSVSATFSESS  
 Aq -----MDSFSTSIFESPTPSILLPETSSSMIFEYPTPSILLPETSSSMIFEYPTPS  
 Em -----

Hs EASMHSVLSLDLHEAVPTVVGIPDGTAVVGRSFRVTIPTDLIASSGDI IKVSAAGKEALPS  
 Lc TSALDQQASTPVVAASTSVPVLESSA-----QPIVSTSAVVSSLSV-----  
 Oc SFISDSFTSTFPPTILSSTSFLTATST-----FSVFSPSPTVNETSSVTPVFST-----  
 Aq ILLPETSSSMPFESPTPSILLPETSS--SMIFEYSTPSILLPETSS-----  
 Em -----SPTSSPLPSPTS-----

.. : ::

Hs WLHWDSQSHTLEGLPLDTDKGVHYISVSATRL---GANGSHIPQ-TSSVFSIEVYPEDHS  
 Lc -----SSAVDVIDDVISSQTSRLRI---PVETPVVPS-TTGTDPDIQITSTTAQ  
 Oc -----SFPQLNSSSIVTTSTASSEISLSPVSTTAVPSVTNSSF-----  
 Aq -----SMPFESPTPSILLPETSSM---IFESPTLSSLLPETSSVSFILESVS  
 Em -----SLP-----

. .

Hs ELQSVRTASPDPEVGVSSACAADEPVTVLTVILDADLTGMTPKQRIDLLHRMRSFS----  
 Lc IAETTTLPSSLPSVLLDEVFTTEVPTASSSPMDFLLPETTRASSSLVSTVEVEQITTVA  
 Oc ----ATVTSRFTSATSIIETTSFSPISVVFSTSSLPVSSTTPFENSSTVFSSISAT----  
 Aq ELFESPSPTLFPDSSSSEIIFETPISSSSGTFESPTPSFIEPSSSSDIMFDDPTSILQTS  
 Em -----

Hs -----EVELHNMKLVVVNNRFLDMSAFMAGPGNAKKVVENGALLSWKLGCSLNQN  
 Lc PEITPVLTTAVTSSMTRVPDVSTVVIDFSPFATATADSSSSSA----LTPVATSIPLL  
 Oc ----SVFTVASSNFSTISPVSTTTAVSPTSFSFEVSTQTPTSVS----AVRNTTSVSFN  
 Aq SFISPI---APSEDFTPIPSPTDEFSSPTPSFLLSSSDEITSSS----EFESSLILLFS  
 Em -----

Hs SVP----DIHGVEAPAREGAMSAQLGYPVVG-WHIANKKPLPKRVRRIHATPTPVTAI  
 Lc DQS----IADGSGLDTSEVTSTTPLAIPSTIGFEFSTVDLFPASAS----AQPSTTEFI  
 Oc ESDTQVFTVTSVFSTASVSSSSTKVFPNSF-SSTGPSTSLVPSVSTTPVLSKTSSANFS  
 Aq SSS----EIISELLPTSSIEEEPFTTVPSIGESFTAVTSIYISSTSTTNKFPSSSFGDLS  
 Em -----LSMPSII-----

\*

Hs GPPTTAIQEPP-SRIVPTPTSPAIAAPTETMAPPVRDPVPGKPTVTIRTRGAI IQTPTLG  
 Lc IPSTTAGLD----IIP-----  
 Oc VVISSTLSPTLVPSLPVVNSTSSIGVSTSVAPNSTTVSSTTAVNTLSSVSPVPTTSVQ  
 Aq SSVVTEFSMDISSIVPSPSTQTPTPSSTHGPPFASITSELSSTSEIPFESSSEFITE  
 Em -----SSSLP-----

: \*

Hs PIQPTRVSEAGTTVPQGIRPTM-TIPGYVEPTAVATPPTTT---TKKPRVSTPKPATPST  
 Lc PLLSSPHLSVFSTATEEVFTTIIETQPASSTVGMSTPLLSTDVSGE--FTLPTPVSSSG  
 Oc TSVSTPVPNVTTSAVFSTSSFLRSISPTPNVSTIQTPASSSVVATSSSFISTIVPKATST  
 Aq SFFTFFVSESTSFQSPSIDMTRSLPPSESTSTIVSSPVTSSKITSGSEFSTFLPPSTEESS  
 Em -----PSPLTSST

\* : .

Hs DSTTTTTRRPTKKPRTPRP-----VPRVTTKVSITRLETASP-----  
 Lc PVLDAASLSTVSVASTQDIS-----TARLTTSELVSSFESFSPMATASPM--  
 Oc SVPPSSISTSPVTVTSIFS-----NVSISLSSLVASISSISVTSISSG--  
 Aq MSLSASISPSSTLLSVIVSSFIEESSTSITLDVSTITEPSFDSSFLFSTSLTKVTSLVE  
 Em SSLSPT-----

. :

Hs -----PTRIRTTTSGVPRGGE-PNQRPELKNHIDRVDAWVGTYFEVKIPSDTFYDHE  
 Lc -----TTVIVTTPVVTAPPTPAP-VDNPPPEINGDLQQYDVLVGEYLEMVLDP SHFIDED  
 Oc -----TSSPTSVVPTPTPTPGP-PNTAPFVLNQIQRISVFANRPYFFLIPGDTFYDMQ  
 Aq ISPSSTKIFSPTITSSSEAPSPSP-TNNRPLLLNPIGALLVQEGTVFHSHPDPTFYDIE  
 Em -----PSTTPSPTPCPYGNKPPVAASPIGIVLVNEGQLFQFTISKTAFAVATA

. : \* : \* . : . : :

Hs DTTTDDK----LKLTLKLRQQLVGEKSWVQ-FNSN-----SQLMYGLPDSSHVGHK  
 Lc TNGSLCAVCMLQLHLLNIVGNRVADSGPVRANTTPSADGTFRRTLQIYGLPR--HGNSI  
 Oc DGDTRA----LTLRLRDLNSPPAADSWIQ-LRED-----SQELVMLPSFFELGST  
 Aq DG-----YNLTLRLQS-----EVNWIGIMNQ-----AIIGLPLSTEIIGHYI  
 Em PGN-----LTLTLLDTSGNALPNTSWVQ-LRGS-----TLEGVALRDAVVMGAI

\* \* . : . : :

Hs E-YFM--HATDKGGLSAV**DAFEI**HVHRRPQGDRAPARFKAKFVGD PALVLNDIHKKIALV  
 Lc TPYVL--RAMDSRGNVADDAFA**V**SVLPFPDGVPLSNEITVLLQENFTVFNSTWLRQVQFM  
 Oc I-FLL--FATDKEGLIARMTFE**V**FVN-IPPIVTSTNVITQSFDVNFQAVNADTLQKLLKI  
 Aq TRYNIEIRAYDRNGRFASEIIT**V**SVNPR-HGLLLENYIQVSDENFTTFNENVRKAVDLI  
 Em TDLVLVVRASDDCGGSAYNFAT**I**RVLPQPSRV--NPLLHVHVEGDYLMASQLSTRIRLV

: \* \* \* \* : \* : . : : : :

Hs KKL--AFAFGDRNCSTITLQINITR**GS**IVVEWTNNTLPL-EP**C**PKEQIAGLSRRIAEDDGK  
 Lc SSLQSAITATGSGPQLLMVFPIQQ**GS**VIARVSDIALVS---**C**-----DSGQ  
 Oc DDL--ANFAKV-DPALVLVNDIRE**GS**LVLVSWSLTNITSID**C**--STVYKIFNSMF-NGDD  
 Aq TKL-----GMSDPNDIYVYSLT**GS**VVISYTNISIRS-DD**C**--KEFNNFVNSIY-HSRN  
 Em QRL--AAFGGSTNPRAIYVAEFRE**G**TVGVLYANLSISD-FE**C**--EAFRSWTLISIY-VEGN

\* : : : : \* : : : \*

Hs PRPAFNALEPDFKATSITVTGSGS**CR**HRLQFIPVPPRRVPSEAPPTEVPDRDPEKSSSED  
 Lc RQDQNTASALRSLGTNATVN--VT**C**QS--VTVQEPTAEVGF AISPDT-----GQM  
 Oc VTPEFAAALSEFKPQKSSSLT--GV**C**NNPIVVTQPPVTVAGLNEGVE-----PDALSDS  
 Aq YTDAFKTQINPYIPIGSLKVF--GT**C**NRSVGTYETIQPTIGIIDDPISE-----EQ  
 Em YTWQFRDAILPFVAAKVPSFV--GP**C**S---VSSFNITPTLGSKATNIS-----SLATTET

: . . \* : :

**TM**

Hs DVYL**LHTVIPAVVVAAILLIAGIIAMICY**RKKRKKGKLTLED---QATFIKKGVPIIFADEL  
 Lc IDSLNVIIPVSAVLGVVLI AAVVATVYYRRHRPERKCLRGRTRMRRTFDRRNPILISGERD  
 Oc ESYVNFVPAIVIGAVLLVGVLVFMLYRARRKSRQDIEASRGSTSTYFDRTPVVFNGEAT  
 Aq LIFLAVVLPVVLACILLVCLVVFITYRWRRMERNYILN-EEQKILLNRKPIVFLDESE  
 Em TSLLETIVPLVVVAFLLLAAGIAGCLLYRFHRPERKHLYG--SRSTYLNRPQ-VYMNDEL

: : \* . : : \* : : \* \* . \* . : :

Hs DDSKPPSSSMPILIQEEKAPLPPPEYPNQSVPETTPLNQDTMGEYTPLRDEDPNAPPYQ  
 Lc RQRRRPRPPT----VLRSETRAPVGRRTTSVRLAELIEEGEMTSLMADLDEEGTR-PQFN  
 Oc GDGIDGAQPAR---IVDTPSPPPFGQRGEPTDS--GEEGGDEISFHSGEAGDAGSS-PSVL  
 Aq SLSRSRRPTILAERLRGSGYHSLMNTSEGLDDFTFTIPEHDTVSLT---DEALQFPFVE  
 Em NLPIRRGPPLF---IQGEGEPATLTRERAPVMGEHGYDHPDRTVDFSDDEDLVNVALLA

. : : :

Hs P P P P F T A P M E G K G S R P K N M T P Y R S P P -----  
 Lc E P P P F H -----V A M H E R R G P P -----

```

Oc          PPPVQSSGRREAPTAKRAVPAYRKPP-----
Aq          ISGP-----SHPNALPPYRHP-----
Em          ARQPVW-----QHASTTPPYRLPPVCVQKDGQLAQASTDYSGLLDGEDGGTIEMGPDT
                *  **

Hs          -----PYVPP-----
Lc          -----PAYTLPPDYILF
Oc          -----PYSLPSDID--
Aq          -----QLR-----
Em          SSEE.EGGRHSSPEYRLPESARLL
    
```

**Fig. S3:** MUSCLE 3.8 multiple sequence alignment of poriferan dystroglycan-like proteins with human DG. Key: Hs, *Homo sapiens*; Lc, *Leucosolenia complicata*; Oc, *Oscarella carmela*; Aq, *Amphimedon queenslandica*; Em, *Ephydatia muelleri*. Key conserved residues are in red. The transmembrane domain is underlined. The symbol ‘\*’ indicates an identical residue; ‘.’ a conservative substitution and ‘.’ a semi-conservative substitution.

**Supplemental Table 1:** GenBank or Compagen Accession codes of the proteins reported in Fig. 6B. Predicted laminin subunits in addition to those reported in this Table were identified in *O. carmela*, *H. magnipapillata*, *N. vectensis* and *A. digitifera*. Key: + probable partial sequence, signal peptide not identified.

| Phylum/Species                                            | $\alpha$ -Sarcoglycan                                                | Sarcospan                     | Dystroglycan                                              | Laminin- $\alpha$                                          | Laminin- $\beta$                    | Laminin- $\gamma$                                                   | Dystrophin                                | SGK196/<br>POMK                     | B4GAT1<br>(ex<br>B3GNT1)      | LARGE1                              |
|-----------------------------------------------------------|----------------------------------------------------------------------|-------------------------------|-----------------------------------------------------------|------------------------------------------------------------|-------------------------------------|---------------------------------------------------------------------|-------------------------------------------|-------------------------------------|-------------------------------|-------------------------------------|
| <b>Filastereans</b><br><i>C. owczarzaki</i>               |                                                                      |                               |                                                           |                                                            |                                     |                                                                     | CR only:<br>XP_004363347/<br>GI:470306037 | XP_004342773/<br>GI:470289127       | XP_004346787/<br>GI:470300042 | XP_004365036/<br>GI:470361182       |
| <b>Choanoflagellates</b><br><i>M. brevicollis MX1</i>     |                                                                      |                               |                                                           |                                                            |                                     |                                                                     | CR only:<br>XP_001742662/<br>GI:167516642 |                                     | XP_001747298/<br>GI:167525928 | XP_001742373/<br>GI:167516064       |
| <i>S. rosetta</i>                                         |                                                                      |                               |                                                           |                                                            |                                     |                                                                     | CR only:<br>XP_004994334/<br>GI:514693524 | XP_004994181/<br>GI:514693218       | XP_004991716/<br>GI:514688280 | XP_004993018/<br>GI:514690889       |
| <b>Ctenophores</b><br><i>M. leidy</i><br><i>P. bachei</i> |                                                                      |                               |                                                           | ML097515a(MGP)+                                            |                                     | MLRB05952<br>(MGP) and<br>ML21866a(MGP)<br>( $\beta/\gamma$ -like)+ |                                           |                                     |                               |                                     |
| <b>Porifera</b><br><i>A. queenslandica</i>                |                                                                      |                               |                                                           | XP_003382371/<br>GI:340367659                              | XP_003387987/<br>GI:340378944       | XP_003390574/<br>and<br>XP_003386652                                | XP_011403729.1<br>GI:761908478            |                                     |                               |                                     |
| <i>O. carmela</i>                                         |                                                                      | g5110.t1(GPEP-<br>COMPAGEN)   | comp34447 (TPEP-<br>COMPAGEN)<br>(IG2 $\rightarrow$ DBS)+ | g7319.t1(GPEP-<br>COMPAGEN)                                |                                     | g7968.t1 (GPEP-<br>COMPAGEN)                                        | g991.t1(GPEP-<br>COMPAGEN)                | g10651.t1(GPEP-<br>COMPAGEN)        |                               | g4929.t1(GPEP-<br>COMPAGEN)         |
| <b>Placozoa</b><br><i>T. adhaerens</i>                    |                                                                      |                               | XP_002116019/<br>GI:196012313                             | XP_002114273/<br>GI:196008815<br>(incomplete<br>sequence+) | XP_002111840/<br>GI:196003946       | XP_002109259/<br>GI:195998782                                       | XP_002116093/<br>GI:196012461             | XP_002117488/<br>GI:196015261       | XP_002115499/<br>GI:196011271 | XP_002117599/<br>GI:196015485       |
| <b>Cnidaria</b><br><i>H. magnipapillata</i>               | Hma2.216143<br>(GPEP-COMPAGEN)                                       | XP_002163153/<br>GI:221119018 | XP_002164217/<br>GI:449662868                             | XP_002170373<br>/GI:449677846                              | XP_002168125/<br>GI:449666107       | XP_002165286/<br>GI:449674332                                       | XP_002162937/<br>GI:449686663             | XP_004208080/<br>GI:449673996       |                               | XP_002154954/<br>GI:449666871       |
| <i>N. vectensis</i>                                       | XP_001641924<br>/GI:156408560<br><br>adi_v1.06362<br>(GPEP-COMPAGEN) |                               | XP_001629936/<br>GI:156375132                             | Nemve1-209260                                              | XP_001631565/<br>GI:156379641       | XP_001628586/<br>GI:156371064                                       | XP_001633160/<br>GI:156384081             | XP_001640835/<br>GI:156405631       | XP_001627257/<br>GI:156367099 | XP_001640724/<br>GI:156405409       |
| <i>A. digitifera</i>                                      |                                                                      |                               | adi_v1.10683<br>(GPEP-COMPAGEN)                           | adi_v1.10227<br>(GPEP-COMPAGEN)                            | adi_v1.10769<br>(GPEP-<br>COMPAGEN) | adi_v1.06175<br>(GPEP-<br>COMPAGEN)                                 | adi_v1.08652<br>(GPEP-<br>COMPAGEN)       | adi_v1.14395<br>(GPEP-<br>COMPAGEN) |                               | adi_v1.15902<br>(GPEP-<br>COMPAGEN) |
